# Supplementary material
Source: PubMed Central journal article supplement (PMC9761565)
Supplement: mmc1.pdf [file mmc1.pdf]

# THE LANCET

## Infectious Diseases

### Supplementary appendix 1

This translation in Italian was submitted by the authors and we reproduce it as supplied. It has not been peer reviewed. *The Lancet's* editorial processes have only been applied to the original in English, which should serve as reference for this manuscript.

Questa traduzione in italiano è stata proposta dagli autori ed è riportata senza modifiche. Il testo tradotto in italiano non è stato sottoposto al processo di revisione paritaria. Il processo editoriale del *Lancet* è stato esclusivamente adottato per l'originale in inglese, che dovrebbe servire da riferimento per questo articolo.

Supplement to: Agrati C, Cossarizza A, Valentina Mazzotta V, et al. Immunological signature in human cases of monkeypox infection in 2022 outbreak: an observational study. *Lancet Infect Dis* 2022; published online Nov 7. [https://doi.org/10.1016/S1473-3099\(22\)00662-4](https://doi.org/10.1016/S1473-3099(22)00662-4).

## **Background**

Dal Maggio 2022 è in corso un focolaio epidemico di Monkeypox (vaiolo delle scimmie) senza precedenti e non sono al momento disponibili dati sulla dinamica della risposta immunitaria contro tale virus. Scopo dello studio è stato quello di descrivere la cinetica della risposta dei linfociti T, il profilo infiammatorio e l'induzione di cellule T poxvirus-specifiche in pazienti con diagnosi di Monkeypox.

## **Metodi**

Presso l'Istituto Nazionale per le Malattie Infettive, 17 pazienti con diagnosi confermata da Monkeypox tra il 19 Maggio e il 7 Luglio, sono stati analizzati per il profilo di differenziazione e di attivazione dei linfociti T CD4 e CD8 (espressione di CD38, PD-1 e CD57 valutata mediante citometria a flusso), per la frequenza di cellule T poxvirus-specifiche (ELISpot) e per il rilascio di IL-1 $\beta$ , IL-6, IL-8 e TNF nel plasma (ELISA). Tutti i pazienti sono stati analizzati 10-12 giorni dopo l'inizio dei sintomi. In un sottogruppo di nove pazienti, la cinetica della risposta immunitaria è stata analizzata longitudinalmente in base al tempo trascorso dall'insorgenza dei sintomi e confrontata con quella di dieci donatori sani (cioè operatori sanitari reclutati nello stesso istituto).

## **Risultati**

Tra i 17 pazienti, dieci erano HIV negativi e sette HIV positivi, tutti con un buono stato viro-immunologico. Nei giorni 0-3 dall'insorgenza dei sintomi, nei pazienti con monkeypox si è osservata una riduzione statisticamente significativa delle cellule T CD4+ ( $p=0.001$ ) e un parallelo aumento delle cellule T CD8+ (0.0057) rispetto ai donatori sani. Inoltre, in 6 pazienti di un sottogruppo di 9 (67%), si è osservata una ridotta frequenza di cellule T CD4+-naïve (CD45RA+CD27+), mentre in tutti una maggiore frequenza di cellule T CD4+-effector/memory (CD45RA-CD27-) che tendevano a normalizzarsi nel tempo. Un simile profilo differenziativo è stato osservato anche a carico dei linfociti T CD8+ con un significativo incremento delle cellule differenziate in modo terminale. Una maggiore frequenza di cellule T-attivate (CD4+CD38+ e CD38+CD8+), che tendeva alla normalizzazione dopo 12-20 giorni dall'insorgenza dei sintomi, è stata osservata nei pazienti affetti da monkeypox rispetto ai donatori sani. Una cinetica simile è stata osservata per l'espressione di PD-1 e CD57. Inoltre, le citochine infiammatorie (IL-1 $\beta$ , IL-6, IL-8 e TNF) erano più elevate nei casi di monkeypox rispetto ai donatori sani e persistevano alterate anche dopo la guarigione. Quasi tutti i pazienti (15 [94%] su 16) hanno sviluppato una risposta Th1 poxvirus-specifica. Non sono state

osservate differenze nel profilo immunitario tra HIV-positivi e HIV-negativi, mentre i pazienti con quadri clinici lievi presentavano una minore alterazione immunitaria.

## **Conclusioni**

I nostri dati hanno dimostrato che la caratterizzazione immunologica in corso di Monkeypox, consiste in un'espansione precoce di cellule T CD4+ e CD8+ effettrici attivate, che persiste nel tempo. Quasi tutti i pazienti, indipendentemente dall'infezione da HIV, hanno sviluppato una risposta Th1 specifica per poxvirus. Questi risultati potrebbero avere implicazioni sull'immunogenicità indotta dalla vaccinazione contro il vaiolo delle scimmie, suggerendo che potrebbe non essere necessario vaccinare persone già infette.
