# Supplementary material
Source: PubMed Central journal article supplement (PMC9761565)
Supplement: mmc2.pdf [file mmc2.pdf]

# THE LANCET

## Infectious Diseases

### Supplementary appendix 2

This appendix formed part of the original submission and has been peer reviewed. We post it as supplied by the authors.

Supplement to: Agrati C, Cossarizza A, Valentina Mazzotta V, et al. Immunological signature in human cases of monkeypox infection in 2022 outbreak: an observational study. *Lancet Infect Dis* 2022; published online Nov 7. [https://doi.org/10.1016/S1473-3099\(22\)00662-4](https://doi.org/10.1016/S1473-3099(22)00662-4).

# Appendix

## **Immunological signature in human cases of monkeypox infection in 2022 outbreak**

Agrati Chiara, Cossarizza Andrea, Mazzotta Valentina, Grassi Germana, Casetti Rita, De Biasi Sara, Pinnetti Carmela, Gili Simona, Mondì Annalisa, Cristofanelli Flavia, Lo Tartaro Domenico, Notari Stefania, Maffongelli Gaetano, Gagliardini Roberta, Gibellini Lara, Aguglia Camilla, Lanini Simone, D'Abramo Alessandra, Matusali Giulia, Fontana Carla, Nicastrì Emanuele, Maggi Fabrizio, Girardi Enrico, Vaia Francesco, Antinori Andrea.

## Supplementary Figure 1

### Kinetic of pro-inflammatory cytokines production during MPXV infection.

The quantification of cytokines (IL1 $\beta$ , IL-6, IL-8, TNF) in plasma samples was performed by automated multiplex immunoassays on Ella<sup>TM</sup> (San José, CA, USA). The hatched line identified the median level of healthy controls (n=10). The green dot identified paucisymptomatic patients, while the red dots identified HIV-positive patients.

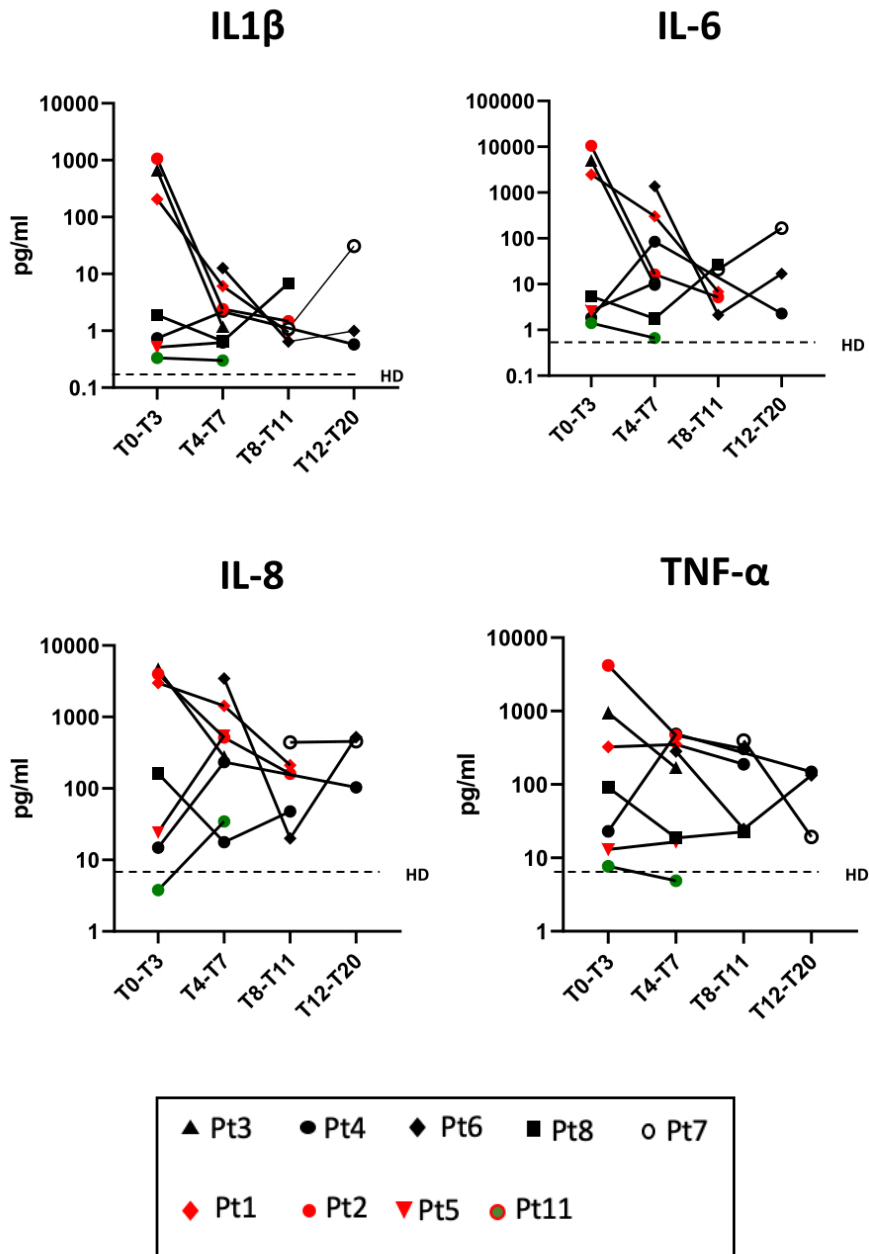

## Supplementary Figures 2

**Metaclusters among CD4+ T cells.** Projection of UMAP graphs stratified by sample embedded with FlowSOM clusters.

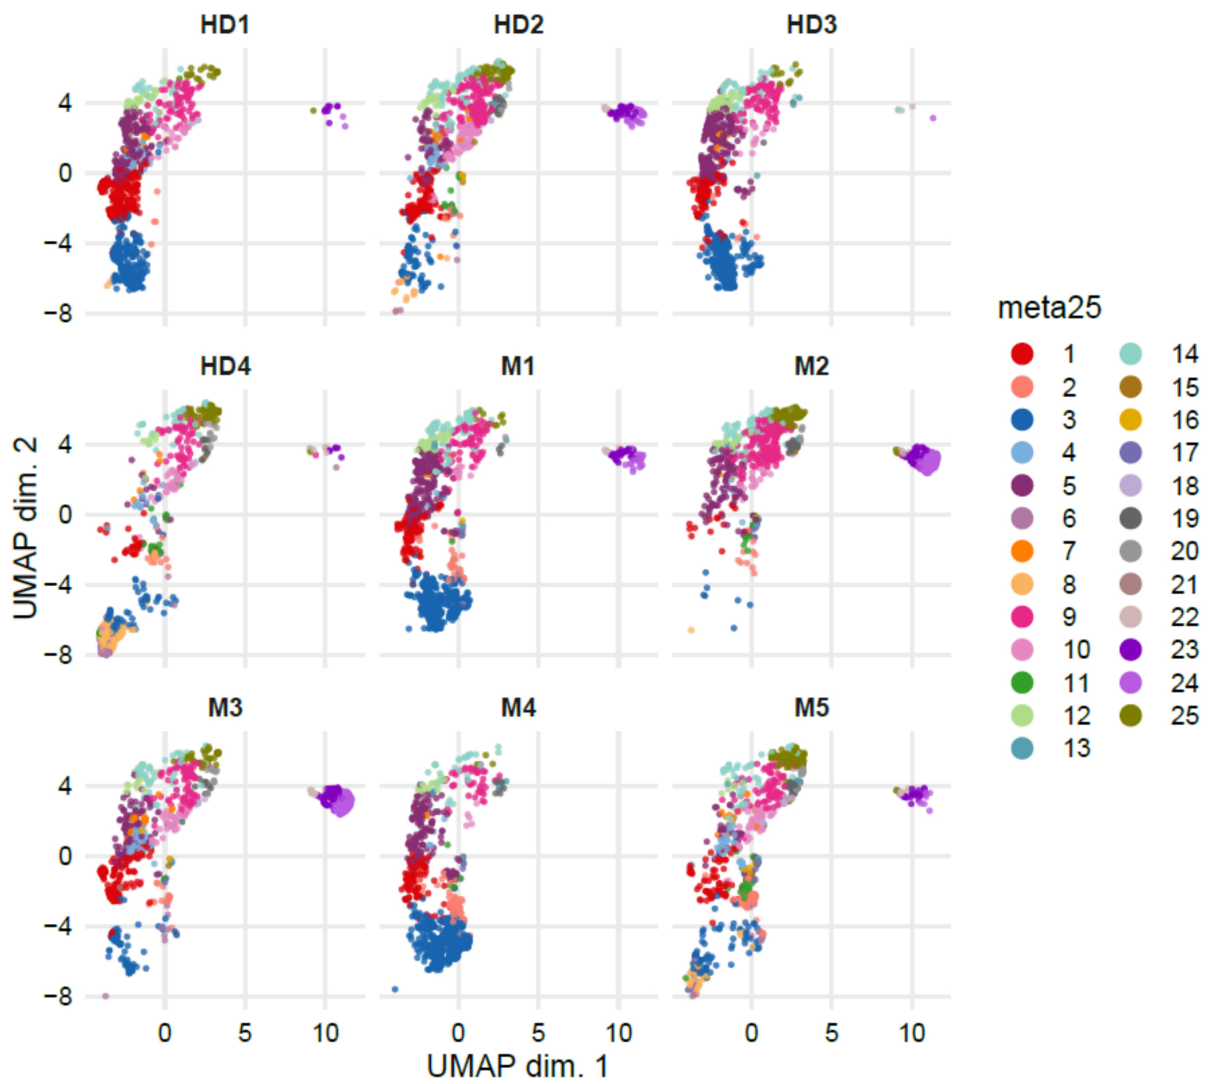



### Supplementary Figures 3

UMAP graphs coloured according to the expression of the 9 markers used for CD4+ T cell phenotyping.

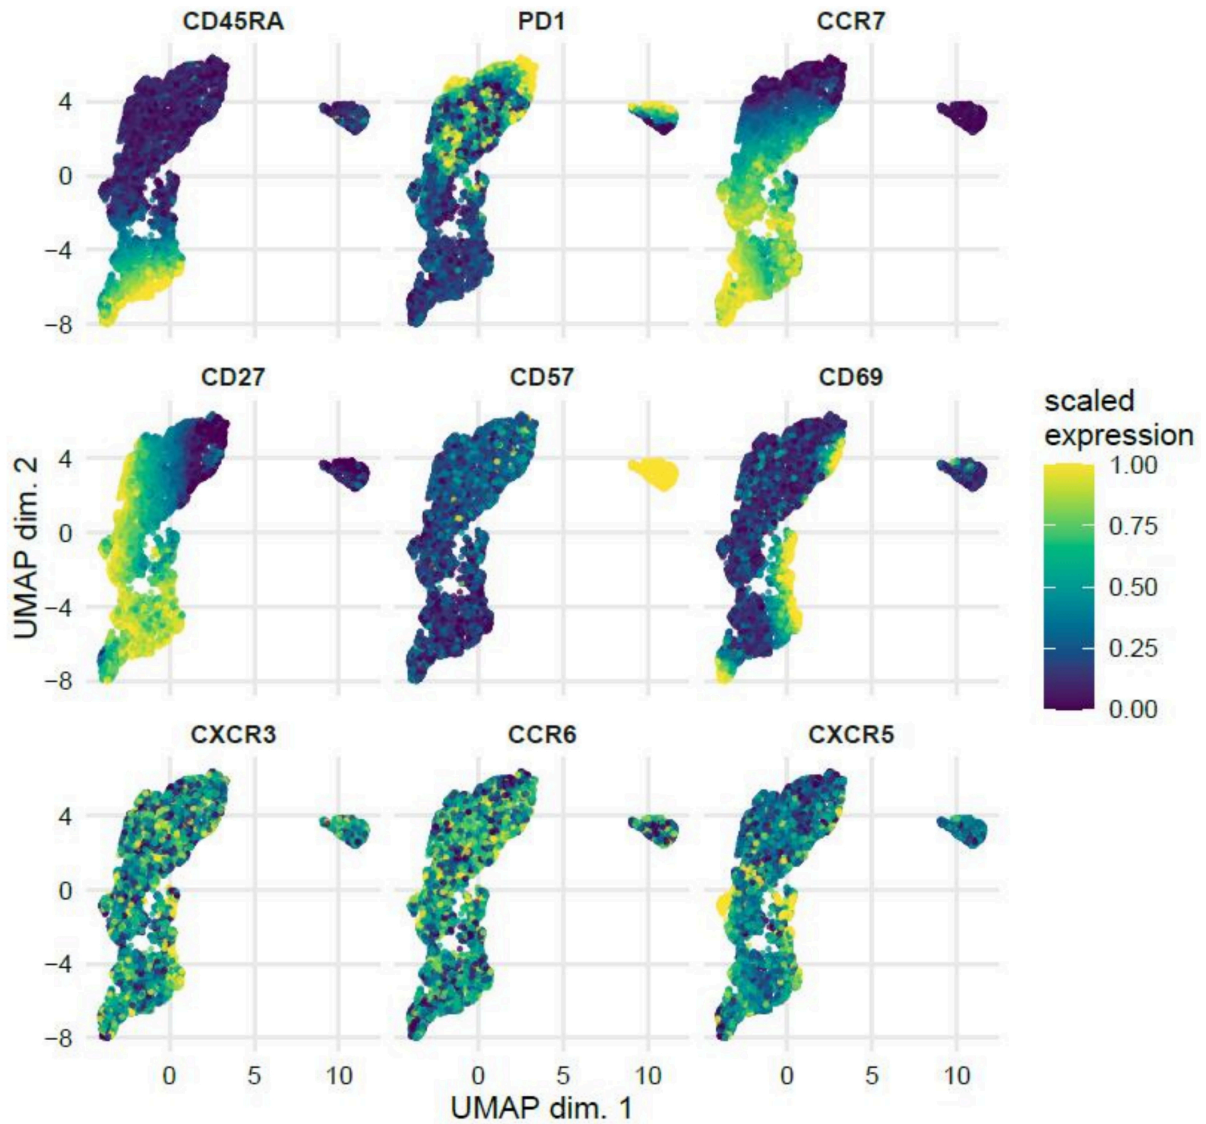

## Supplementary Figures 4

### **Proportion of CD4+ T-cells in different clusters.**

Dotplots show the relative cell percentage of different CD4+ T-cell clusters between healthy donors (H; blue circles; n=4), and monkeypox patients (red circles; n=5). The central bar represents the mean  $\pm$  SEM. When significant, the statistical relevant adjusted p-values obtained by GLMM statistical test comparing H and M cluster percentages are reported in the figure.

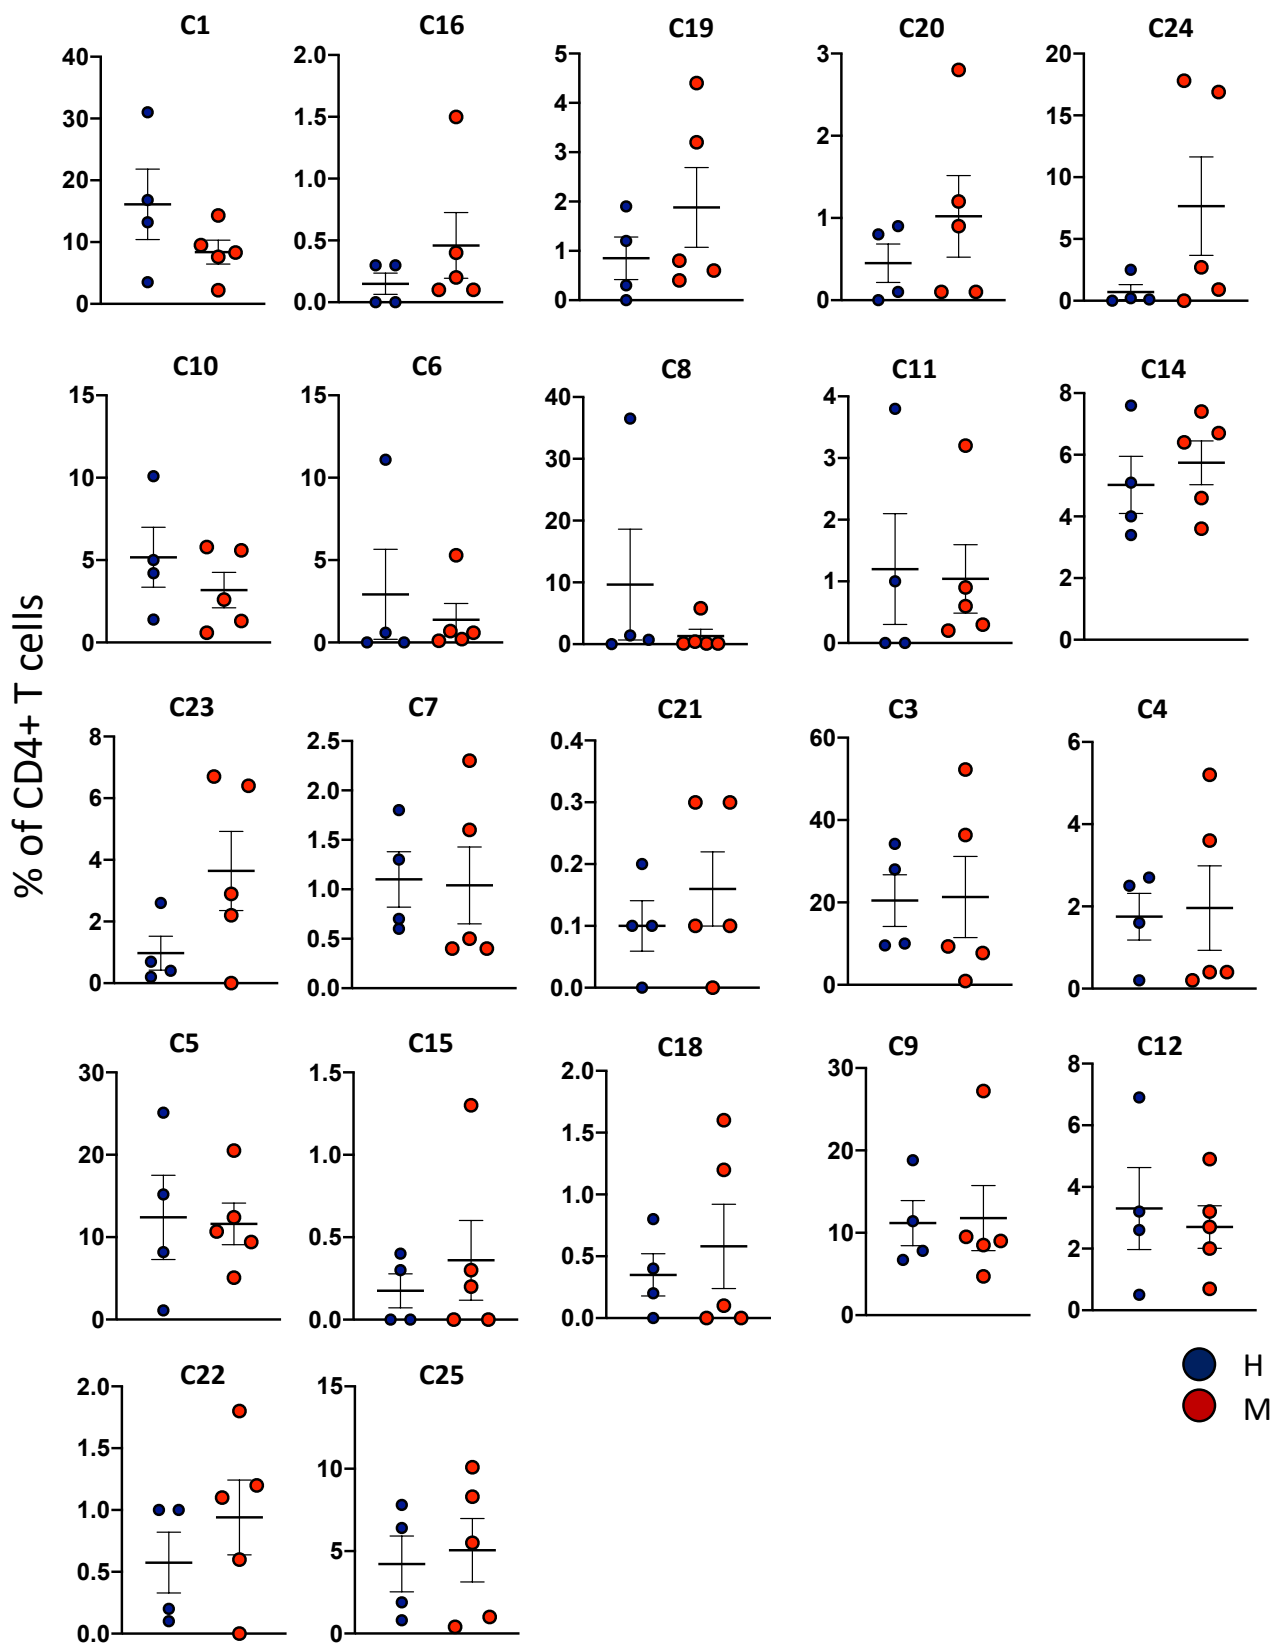

## Supplementary Figures 5

**Metaclusters among CD8+ T cells.** Projection of UMAP graphs stratified by sample embedded with FlowSOM clusters.

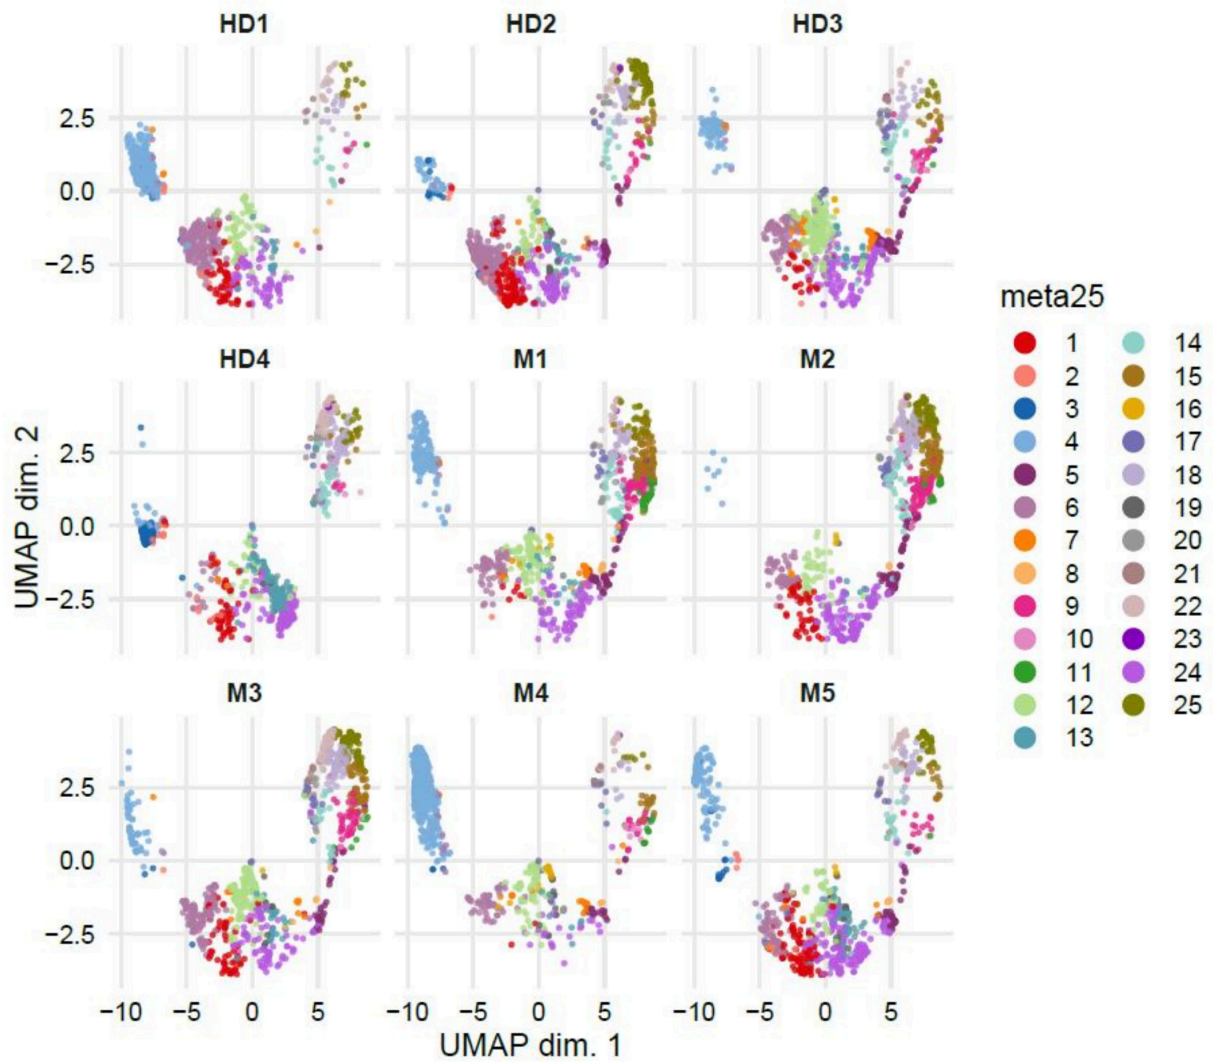

## Supplementary Figures 6

UMAP graphs coloured according to the expression of 9 markers used for CD8+ T cell phenotyping.

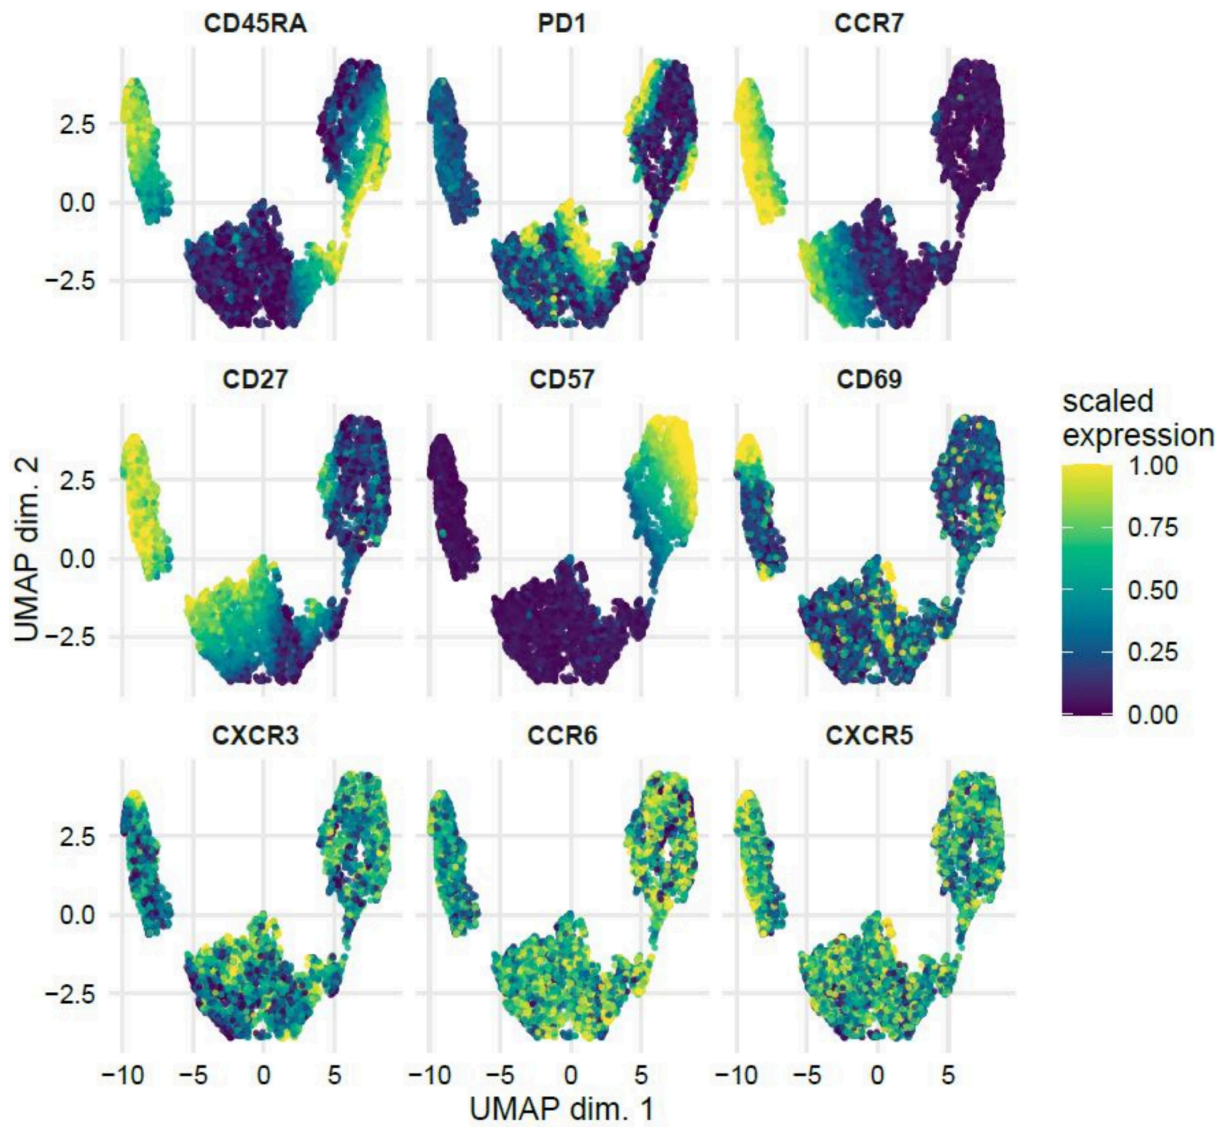

## Supplementary Figures 7

**The proportion of CD8+ T-cells in different clusters.** Dotplots show the relative cell percentage of different CD8+ T-cell clusters between healthy donors (H; blue circles; n=4), and monkeypox patients (red circles; n=5). The central bar represents the mean  $\pm$  SEM. When significant, the statistical relevant adjusted p-values obtained by GLMM statistical test comparing H and M cluster percentages are reported in the figure.

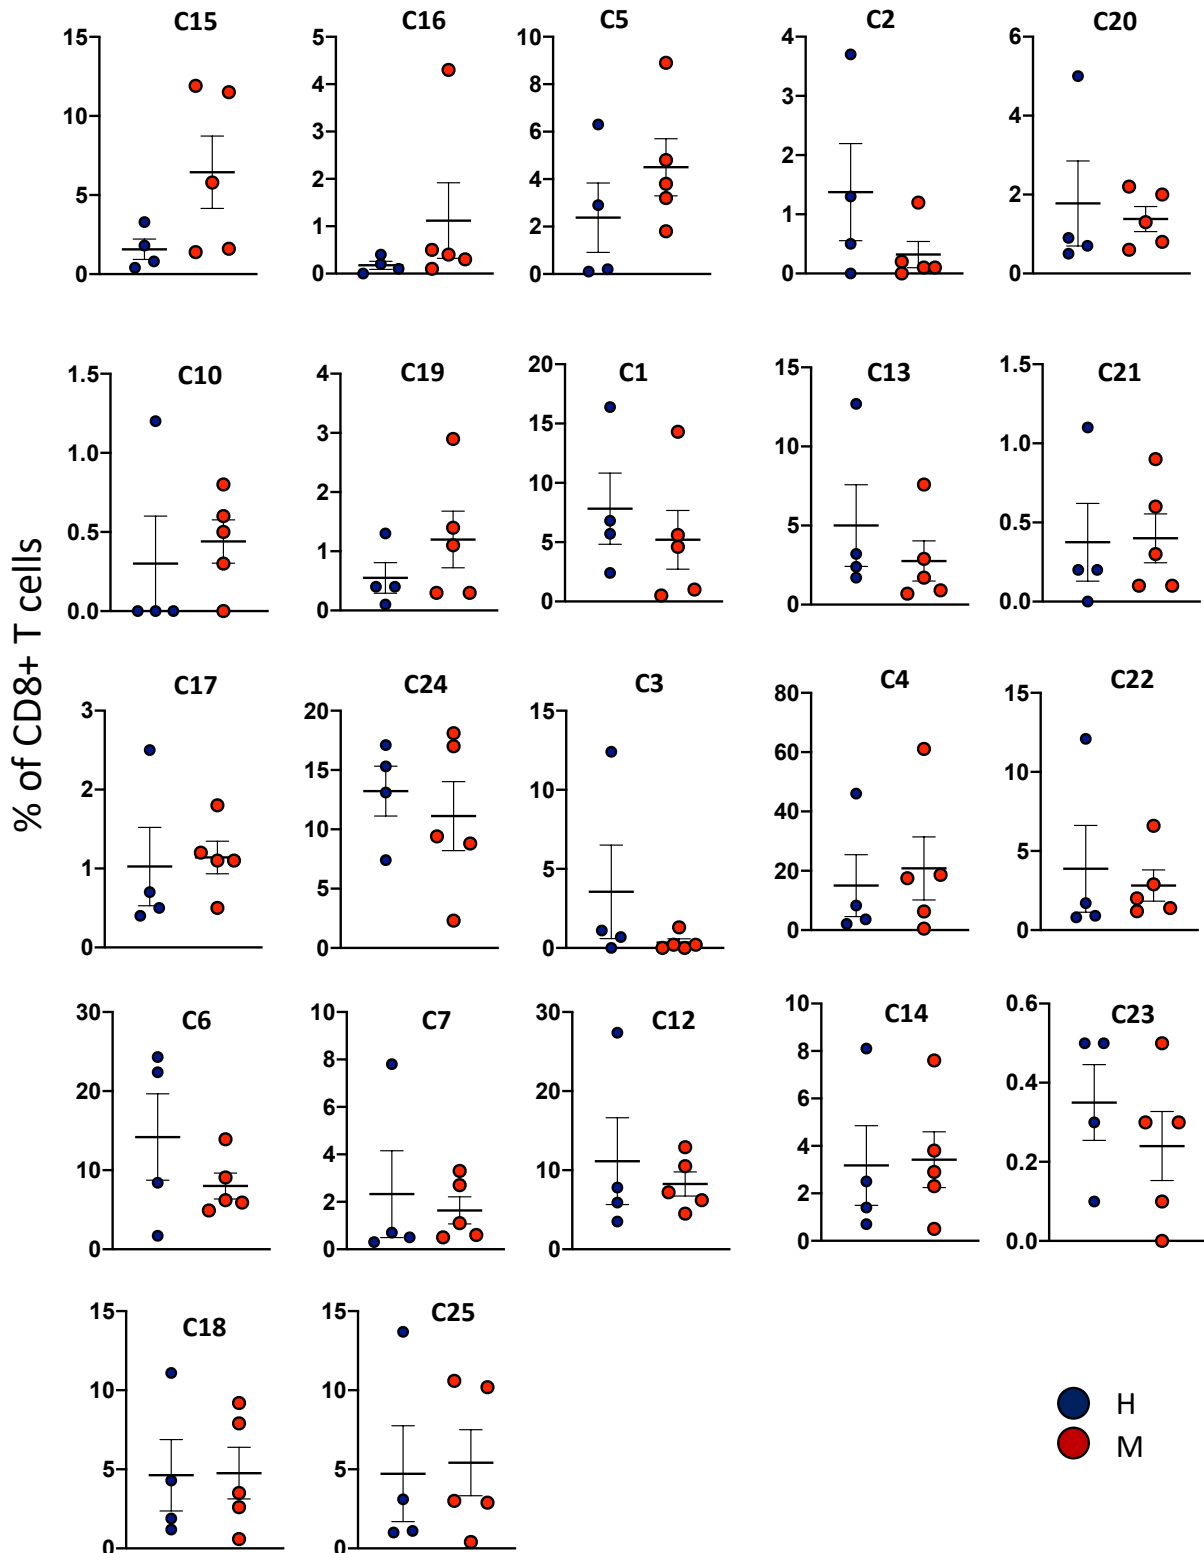

## **INMI Monkeypox Study Group**

Isabella Abbate, Alessandro Agresta, Camilla Aguglia, Alessandra Amendola, Andrea Antinori, Francesco Baldini, Tommaso Ascoli Bartoli, Alessia Beccacece, Rita Bellagamba, Giulia Berno, Aurora Bettini, Nazario Bevilacqua, Licia Bordi, Veronica Bordoni, Marta Camici, Priscilla Caputi, Fabrizio Carletti, Angela Corpolongo, Stefania Cicalini, Eleonora Cimini, Francesca Colavita, Alessandra D'Abramo, Gabriella De Carli, Chiara De Ponte, Patrizia De Marco, Federico De Zottis, Lavinia Fabeni, Paolo Faccendini, Francesca Faraglia, Carla Fontana, Federica Forbici, Concetta Maria Fusco, Roberta Gagliardini, Anna Rosa Garbuglia, Saba Gebremeskel Teckle, Maria Letizia Giancola, Emanuela Giombini, Enrico Girardi, Giulia Gramigna, Elisabetta Grilli, Susanna Grisetti, Cesare Ernesto Maria Gruber, Eleonora Lalle, Simone Lanini, Daniele Lapa, Gaetano Maffongelli, Fabrizio Maggi, Alessandra Marani, Andrea Mariano, Davide Mariotti, Iliaria Mastrorosa, Giulia Matusali, Silvia Meschi, Valentina Mazzotta, Claudia Minosse, Klizia Mizzoni, Martina Moccione, Annalisa Mondì, Vanessa Mondillo, Stefania Notari, Nicoletta Orchi, Sandrine Ottou, Carmela Pinnetti, Silvia Pittalis, Gianluca Prota, Vincenzo Puro, Silvia Rosati, Alberto Rossi, Gabriella Rozera, Marika Rubino, Martina Rueca, Laura Scorzolini, Eliana Specchiarello, Francesco Vaia, Francesco Vairo, Beatrice Valli, Alessandra Vergori, and Serena Vita.
